# Supplementary material for: A Simple BODIPY-Based Viscosity Probe for Imaging of Cellular Viscosity in Live Cells
Source: PubMed Central journal article supplement (PMC5038675; doi:10.3390/s16091397), 2016-08-31
Supplement: sensors-16-01397-s001.pdf [file sensors-16-01397-s001.pdf]

# Supplementary Materials: A Simple BODIPY-Based Viscosity Probe for Imaging of Cellular Viscosity in Live Cells

Dongdong Su, Chai Lean Teoh, Nengyue Gao, Qing-Hua Xu and Young-Tae Chang

## 1. Experimental Procedures

### 1.1. Material and Method

All reactions were performed in oven-dried glassware under a positive pressure of nitrogen. Unless otherwise noted, starting materials and solvents were purchased from Aldrich and Acros organics and used without further purification. NMR spectra were recorded on a Bruker AMX500 (500 MHz) NMR spectrometer. Chemical shifts are reported as  $\delta$  in units of parts per million (ppm) and coupling constants are reported as a  $J$  value in Hertz (Hz). Spectroscopic and quantum yield data were measured on a SpectraMax M2 spectrophotometer (Molecular Devices), compounds are dissolved in 100  $\mu$ L solvent in 96-well plates for  $\lambda_{em}$ . Data analysis was performed using Graph Prism 5.0.

### 1.2. Quantum Yield Measurements

Quantum yields for fluorescent compounds were measured by dividing the integrated emission area of their fluorescent spectrum against the area of rhodamine B in EtOH excited at 490 nm ( $\Phi_{\text{rho-B}} = 0.7$ ). Quantum yields were then calculated using Equation (1), where  $F$  represents the integrated emission area of fluorescent spectrum,  $\eta$  represents the refractive index of the solvent, and  $Abs$  represents absorbance at excitation wavelength selected for standards and samples. Emission was integrated from 500 nm to 700 nm.

$$\Phi_{flu}^{sample} = \Phi_{flu}^{reference} \left( \frac{F^{sample}}{F^{reference}} \right) \left( \frac{\eta^{sample}}{\eta^{reference}} \right) \left( \frac{Abs^{reference}}{Abs^{sample}} \right) \quad (1)$$

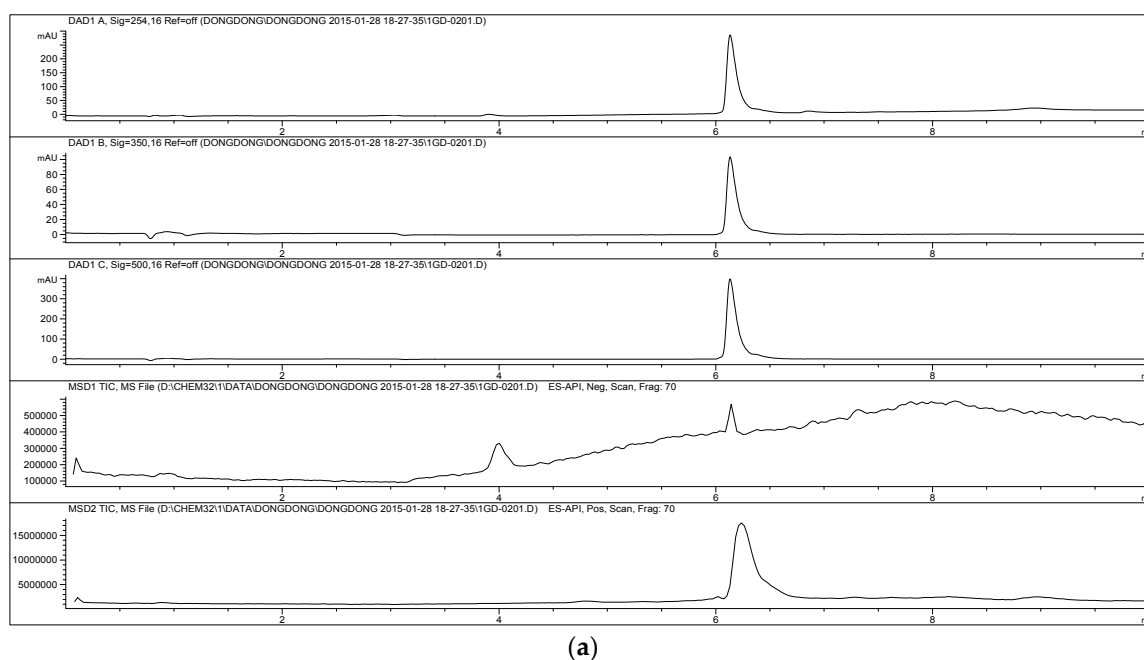

(a)

Figure S1. Cont.

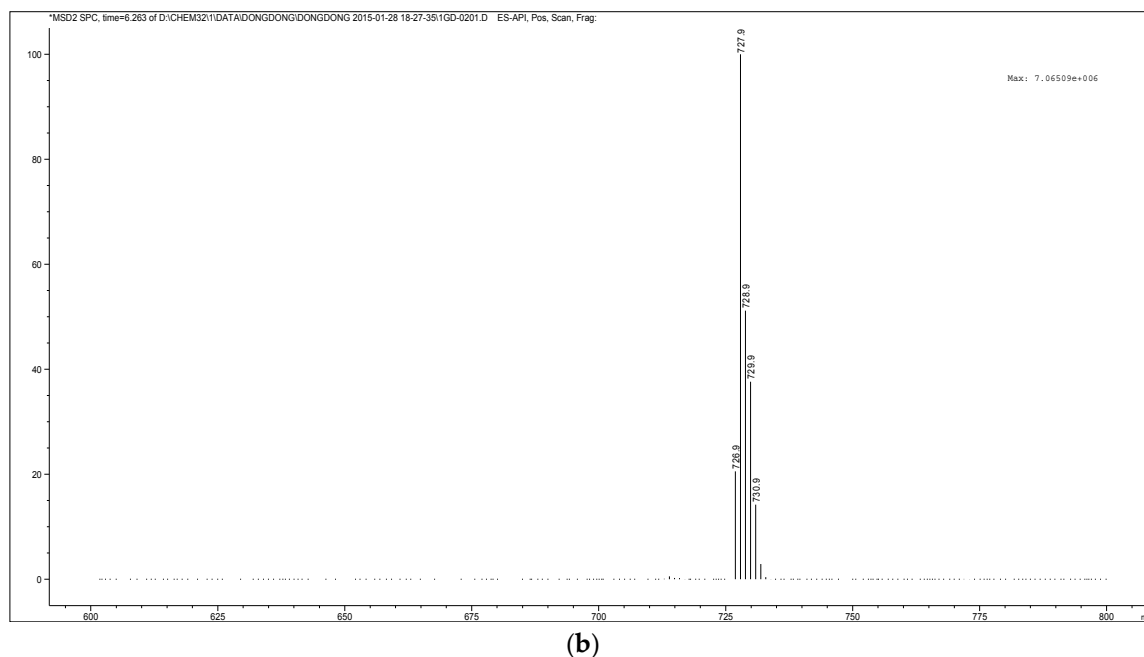

**Figure S1.** LC-MS data of **BTV** (a) Chromatograms (descending order) at 254 nm, 350 nm and 500 nm; (b) ESI-MS positive spectra. HPLC-MS (Agilent-1200 series) with a DAD detector and a single quadrupole mass spectrometer (6130 series) with an ESI probe. Analytical HPLC method: eluents, A: H<sub>2</sub>O (0.1% HCOOH), B: CH<sub>3</sub>CN (0.1% HCOOH), gradient 5% B to 95% B (10 min). Reverse-phase Phenomenex C18 Luna column (4.6x50mm<sup>2</sup>, 3.5mm particle size), flow rate: 1 mL/min.

**Table S1.** Spectral data of **BTV** in different solvents.

|                  | Dielectric Constant | $\eta$ (cP) <sup>a</sup> | $\lambda_{\text{abs}}$ (nm) | $\lambda_{\text{em}}$ (nm) | $\Phi$ <sup>b</sup> |
|------------------|---------------------|--------------------------|-----------------------------|----------------------------|---------------------|
| Dioxane          | 2.2                 | 1.54                     | 494                         | 510                        | 0.02                |
| THF              | 7.6                 | 0.53                     | 494                         | 514                        | 0.02                |
| DCM              | 9.1                 | 0.43                     | 494                         | 514                        | 0.02                |
| Acetone          | 20.7                | 0.32                     | 490                         | 510                        | 0.01                |
| EtOH             | 24.3                | 1.20                     | 490                         | 510                        | 0.02                |
| MeOH             | 32.6                | 0.60                     | 490                         | 510                        | 0.01                |
| MeCN             | 37.5                | 0.37                     | 490                         | 510                        | 0.01                |
| DMSO             | 48.9                | 2.24                     | 494                         | 515                        | 0.03                |
| H <sub>2</sub> O | 78.4                | 1.01                     | 490                         | 514                        | 0.01                |
| Glycerol         | 45.8                | 950.17                   | 494                         | 515                        | 0.56                |

<sup>a</sup> Viscosity of the solvents. <sup>b</sup> Fluorescence quantum yields were measured using rhodamine B ( $\Phi = 0.7$  in EtOH) as a standard.

Table S2. Examples of viscosity sensors.

| Name                                                                             | Sensor Structure                                                                   | Viscosity Change                          | Fluorescence Fold Change | Reference                                                         |
|----------------------------------------------------------------------------------|------------------------------------------------------------------------------------|-------------------------------------------|--------------------------|-------------------------------------------------------------------|
| RY3                                                                              | 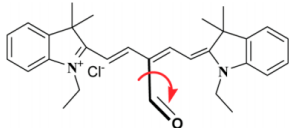  | 1.2 cP (ethanol) to 950 cP (99% glycerol) | 6 times                  | [1] <i>J. Am. Chem. Soc.</i> <b>2011</b> , <i>133</i> , 6626–6635 |
| <i>meso</i> -substituted 4,4'-difluoro-4-bora-3a,4-diaza- <i>s</i> -indacene (1) |   | 0.6 (Methanol) to 950 cP (99% glycerol)   | 12 times                 | [2] <i>J. Am. Chem. Soc.</i> <b>2008</b> , <i>130</i> , 6672–6673 |
| Bodipy 2                                                                         |  | 0.5 to 950 cP                             | 39 times                 | [3] <i>Chem. Commun.</i> <b>2014</b> , <i>50</i> , 5282–5284      |
|                                                                                  |  | 0.6 (Methanol) to 950 cP (99% glycerol)   | 15 times                 | [4] <i>J. Am. Chem. Soc.</i> <b>2013</b> , <i>135</i> , 9181–9185 |

Table S2. Cont.

| Name    | Sensor Structure                                                                                        | Viscosity Change                           | Fluorescence Fold Change | Reference                                                            |
|---------|---------------------------------------------------------------------------------------------------------|--------------------------------------------|--------------------------|----------------------------------------------------------------------|
|         | 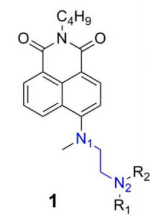 <p><b>1</b></p>       | 20.5 to 945 cP.                            | 34 times                 | [5] <i>Sci. Rep.</i> <b>2014</b> , <i>4</i> , 5418.                  |
| Caz-Cy2 |  <p><b>Caz-Cy2</b></p> | 1.01 (water) to 950 (glycerol)             | 80 times                 | [6] <i>Chem. Eur. J.</i> <b>2013</b> , <i>19</i> , 1548–1553         |
| BV1     |  <p><b>BV1</b></p>     | 1.01 (water) to 950 (glycerol)             | 50 times                 | [7] <i>Chem. Eur. J.</i> <b>2014</b> , <i>20</i> , 4691–4696         |
| Rotor 1 |  <p><b>1</b></p>      | 0.6 (Methanol) to 950 cP<br>(99% glycerol) | 12times                  | [8] <i>Nat. Chem.</i> <b>2009</b> , <i>1</i> , 69                    |
| Mito-V  |                      | 1.1 (water) to 871 cP<br>(90% glycerol)    | 63 times                 | [9] <i>Sensors and Actuators B</i> <b>2014</b> , <i>19</i> , 685–693 |

**Table S3.** Viscosity-dependent fluorescence lifetime of BTV in solvent mixtures.

| Portion of Glycerol | $\eta$ (cP) | $\tau$ (ps) | $\log \eta$ | $\log \tau$ |
|---------------------|-------------|-------------|-------------|-------------|
| 0.1                 | 1.8         | 109         | 0.255273    | 2.037426    |
| 0.2                 | 4.8         | 124         | 0.681241    | 2.093422    |
| 0.3                 | 7.7         | 168         | 0.886491    | 2.225309    |
| 0.4                 | 13          | 232         | 1.113943    | 2.365488    |
| 0.5                 | 28          | 416         | 1.447158    | 2.619093    |
| 0.6                 | 58          | 672         | 1.763428    | 2.827369    |
| 0.7                 | 130         | 1113        | 2.113943    | 3.046456    |
| 0.8                 | 250         | 1775        | 2.39794     | 3.249076    |
| 0.9                 | 630         | 2650        | 2.799341    | 3.423246    |
| 0.99                | 950         | 3690        | 2.977724    | 3.566991    |

## References

- Peng, X.; Yang, Z.; Wang, J.; Fan, J.; He, Y.; Song, F.; Wang, B.; Sun, S.; Qu, J.; Qi, J.; et al. Fluorescence ratiometry and fluorescence lifetime imaging: Using a single molecular sensor for dual mode imaging of cellular viscosity. *J. Am. Chem. Soc.* **2011**, *133*, 6626–6635.
- Kuimova, M.K.; Yahioğlu, G.; Levitt, J.A.; Suhling, K. Molecular rotor measures viscosity of live cells via fluorescence lifetime imaging. *J. Am. Chem. Soc.* **2008**, *130*, 6672–6673.
- Lopez-Duarte, I.; Vu, T.T.; Izquierdo, M.A.; Bull, J.A.; Kuimova, M.K. A molecular rotor for measuring viscosity in plasma membranes of live cells. *Chem. Commun.* **2014**, *50*, 5282–5284.
- Yang, Z.; He, Y.; Lee, J.H.; Park, N.; Suh, M.; Chae, W.S.; Cao, J.; Peng, X.; Jung, H.; Kang, C.; Kim, J.S. A self-calibrating bipartite viscosity sensor for mitochondria. *J. Am. Chem. Soc.* **2013**, *135*, 9181–9185.
- Liu, T.; Liu, X.; Spring, D.R.; Qian, X.; Cui, J.; Xu, Z. Quantitatively mapping cellular viscosity with detailed organelle information via a designed PET fluorescent probe. *Sci. Rep.* **2014**, *4*, 5418.
- Liu, F.; Wu, T.; Cao, J.F.; Cui, S.; Yang, Z.G.; Qiang, X.X.; Sun, S.G.; Song, F.L.; Fan, J.L.; Wang, J.Y.; Peng, X.J. Ratiometric Detection of Viscosity Using a Two-Photon Fluorescent Sensor. *Chem-Eur. J.* **2013**, *19*, 1548–1553.
- Zhu, H.; Fan, J.L.; Li, M.; Cao, J.F.; Wang, J.Y.; Peng, X.J. A “Distorted-BODIPY”-Based Fluorescent Probe for Imaging of Cellular Viscosity in Live Cells. *Chem-Eur. J.* **2014**, *20*, 4691–4696.
- Kuimova, M.K.; Botchway, S.W.; Parker, A.W.; Balaz, M.; Collins, H.A.; Anderson, H.L.; Suhling, K.; Ogilby, P.R. Imaging intracellular viscosity of a single cell during photoinduced cell death. *Nat. Chem.* **2009**, *1*, 69–73.
- Jiang, N.; Fan, J.L.; Zhang, S.; Wu, T.; Wang, J.Y.; Gao, P.; Qu, J.L.; Zhou, F.; Peng, X.J. Dual mode monitoring probe for mitochondrial viscosity in single cell. *Sens. Actua. B Chem.* **2014**, *190*, 685–693.
